# Supplementary material for: Nanomaterial-based fluorescent biosensors for veterinary drug detection in foods
Source: PubMed Central journal article supplement — J Food Drug Anal. 2020 Dec 1;28(4):575–94. doi: 10.38212/2224-6614.1267 (PMC9261812; doi:10.38212/2224-6614.1267), 2020-12-01
Supplement: jfda-28-04-575-s001.pdf [file jfda-28-04-575-s001.pdf]

## **Research Highlights**

- Optical properties of nanomaterials useful for veterinary drug detection summarized.
- Antibody-based immunoassays reviewed.
- Aptamer-based biosensor designs reviewed.
